# Supplementary material
Source: publisher site journal article supplement (https://www.dovepress.com/get_supplementary_file.php?f=418352.docx)
Supplement: Supplementary file 1 [file get_supplementary_file.php]

**Appendix 1.** Questionnaire on hand eczema used in the study

1. Have you ever heard of hand eczema? Yes No
2. Do you know what hand eczema is? Yes No
3. Do you use hand creams regularly? Yes No

If yes, how frequently:

- once daily
- several times a day
- once a week
- several times a week

1. What are the preventing procedures of the disease (hand eczema) shown on the photograph? (multiple answers allowed)


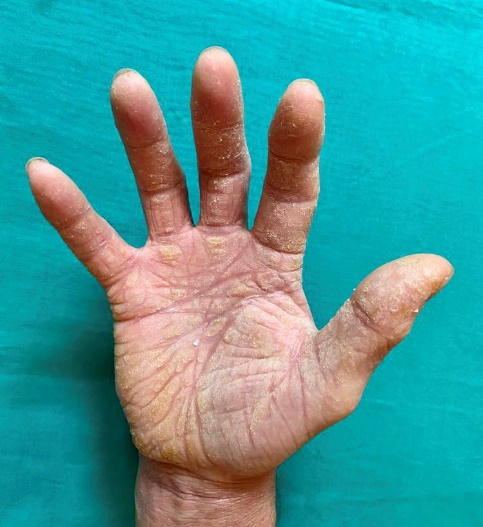


- frequent hand washing
- avoidance of allergic substances/allergens
- avoidance of irritating substances
- sun exposure
- avoidance of sun exposure
- usage of hand creams
- none of above
